# Supplementary material for: A low molecular weight brown algae Laminaria japonica glycan modulation of gut microbiota and body weight in mice
Source: Royal Society of Chemistry journal article supplement (doi:10.1039/d1fo03024h), 2021-01-01
Supplement: d1fo03024h1.pdf [file d1fo03024h1.pdf]

## Electronic Supplementary Material (ESI)

### Supplementary Figures

**Fig. S1 Gut community  $\alpha$  and  $\beta$  diversity.** (A) ACE indices. (B) Chao1 indices. (C) Shannon indices. (D) Simpson indices. (E) Fisher indices. (F) PCA plot of control (blue), 2'FL (red) and LNP (green) samples.

**Fig. S2 LEfSe analysis at the species level.** (A) LEfSe analysis between the control and the 2'FL group. (B) LEfSe analysis between the control and the LNP group.

**Fig. S3. Difference of metabolic pathways between groups.** (A) Post-hoc analysis between the control and the LNP group based on the MetaCyc pathway. (B) Post-hoc analysis between the control and the 2'FL group based on the MetaCyc pathway. (C) Post-hoc analysis between the 2'FL and the LNP group based on the MetaCyc pathway. (D) Post-hoc analysis between the control and the 2'FL group based on the KEGG pathway.

Fig. S1

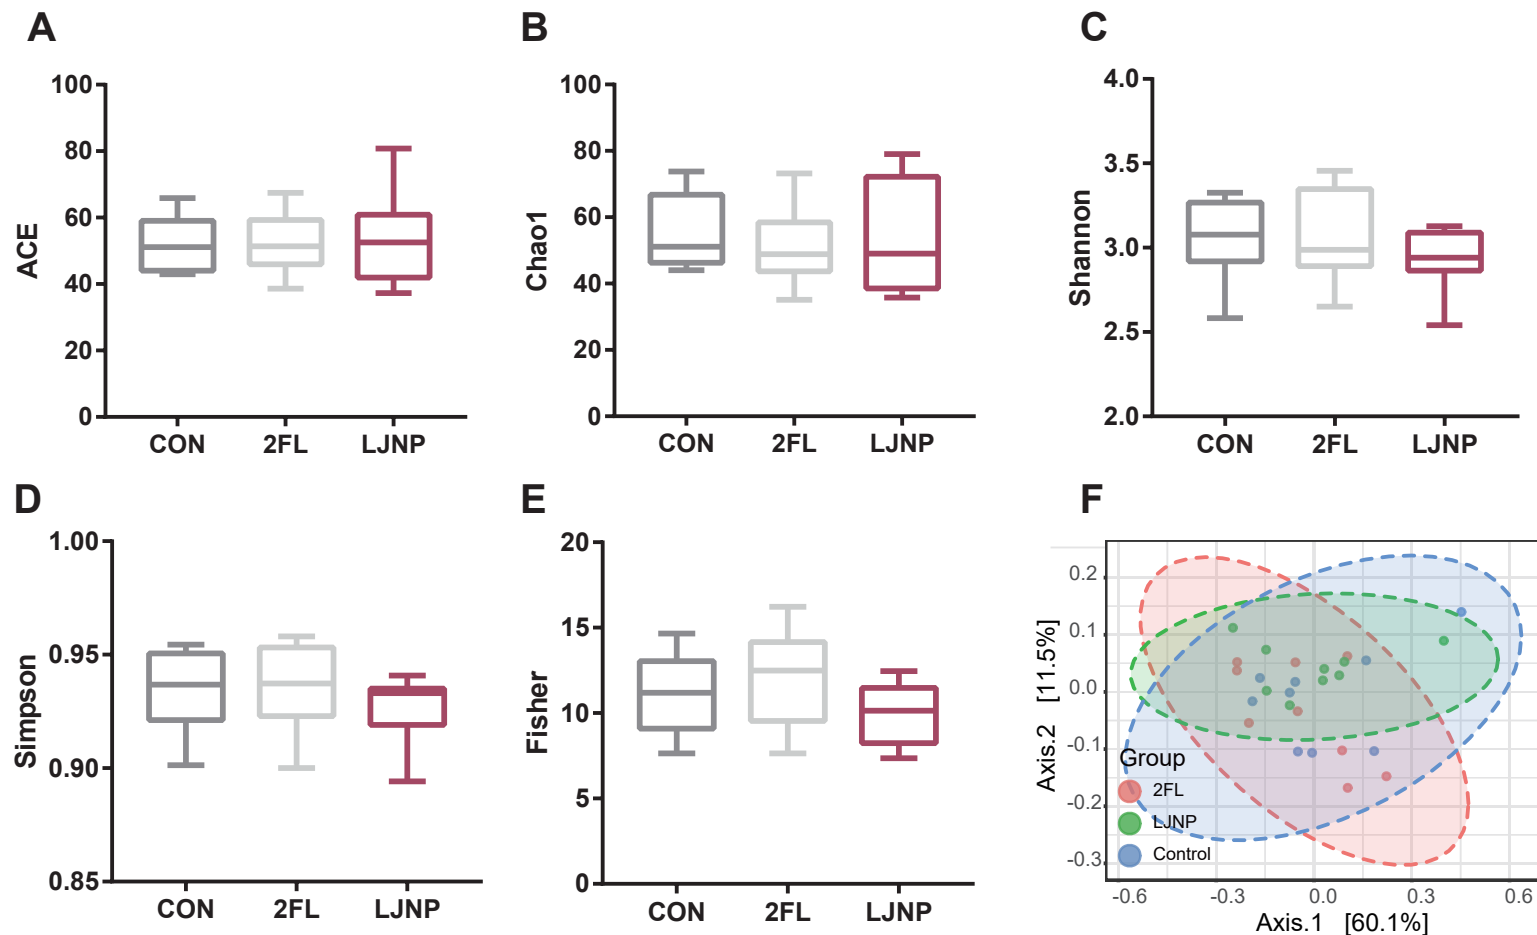

**A**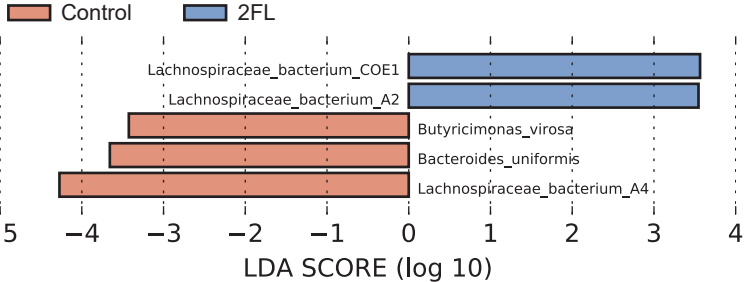**B****Fig. S2**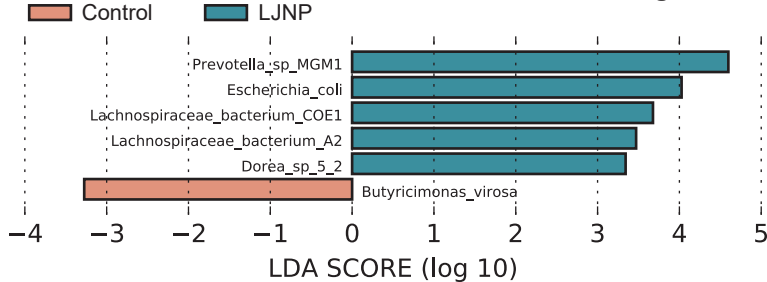

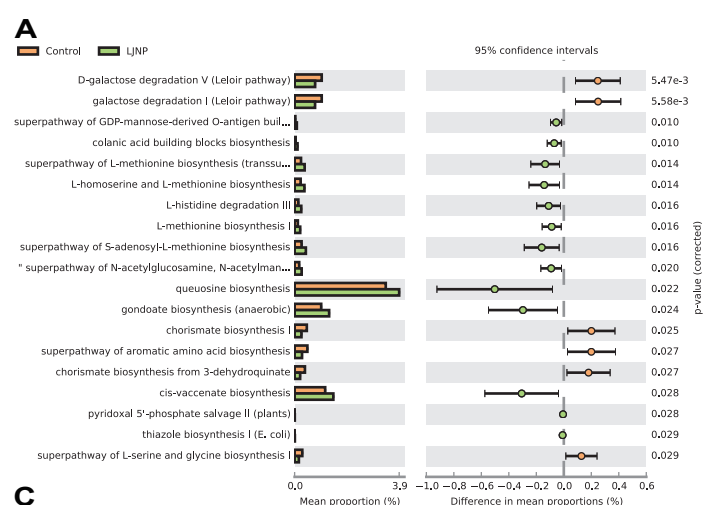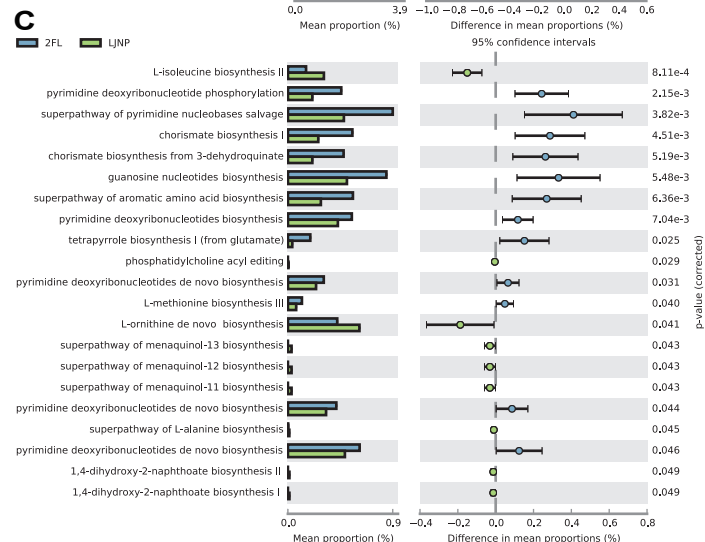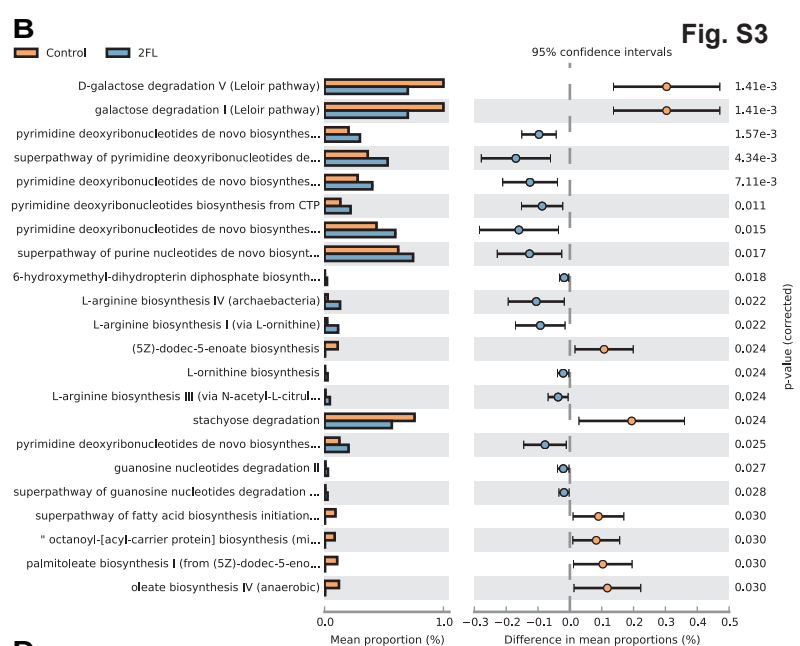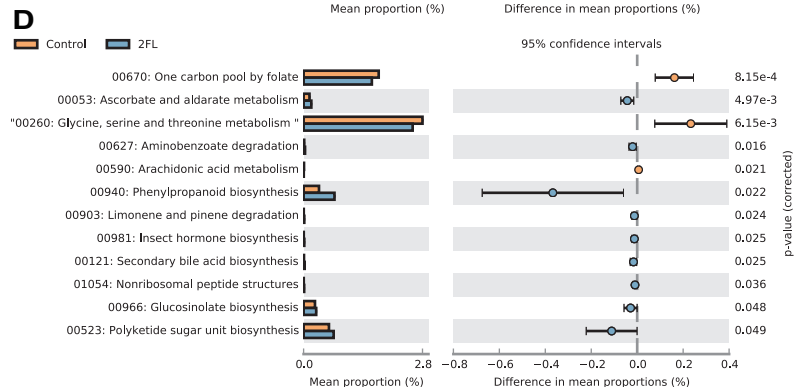

**Fig. S3**
